# Supplementary material for: Prediction of Radix Astragali Immunomodulatory Effect of CD80 Expression from Chromatograms by Quantitative Pattern-Activity Relationship
Source: Biomed Res Int. 2017 Feb 28;2017:3923865. doi: 10.1155/2017/3923865 (PMC5350422; doi:10.1155/2017/3923865)
Supplement: Supplementary file 1 — Supplementary Material contains figures that further help the readers to have a complete understanding of the schemataic diagram of the development of the CD80-QPAR chemometric model (Supplementary Figure 1); the importance of data pre-processing (Supplementary Figure 2); the similarity indices of all 72 samples of 3 batches (Supplementary Figure 3); and the variables selected for the EN chemometrics model (Supplementary Figure 4). In addition, we also provide in the Supplementary Materials three important tables: to explain how the variations of extraction factors leading to 72 different RA extracts (Supplementary Table 1); the Similarity indices of the three batches of RA extracts (Supplementary Table 2); and the detailed statistical results comparing the three batches (Supplementary Table 3). [file 3923865.f1.pdf]

## MEASURING DEVICES

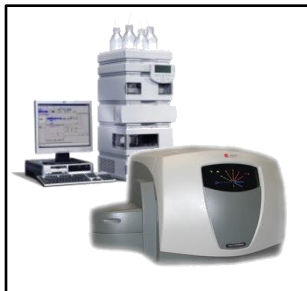

TRAINING SET  
HERB A

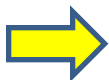

TRAINING SET  
CHEMICAL FINGERPRINT

TRAINING SET  
BIOLOGICAL ACTIVITY

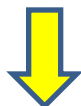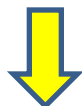

DATA  
PRE-PROCESSING

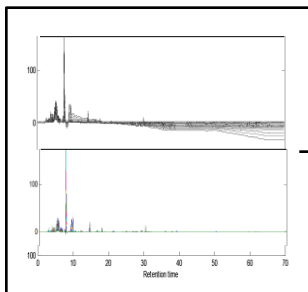

DIMENSIONALITY  
REDUCTION

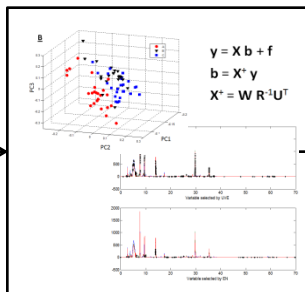

$$\begin{aligned} \mathbf{y} &= \mathbf{X} \mathbf{b} + \mathbf{f} \\ \mathbf{b} &= \mathbf{X}^+ \mathbf{y} \\ \mathbf{X}^+ &= \mathbf{W} \mathbf{R}^{-1} \mathbf{U}^T \end{aligned}$$

MODEL  
REFINEMENT

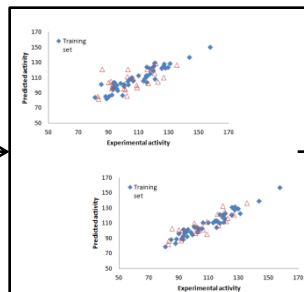

TEST SET  
HERB A  
CHEMICAL FINGERPRINT

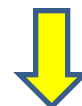

QPAR  
model

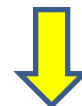

PREDICTION  
BIOLOGICAL ACTIVITY

**Supplementary Figure 1.** The schematic diagram of the development of the CD80-QPAR chemometric model.

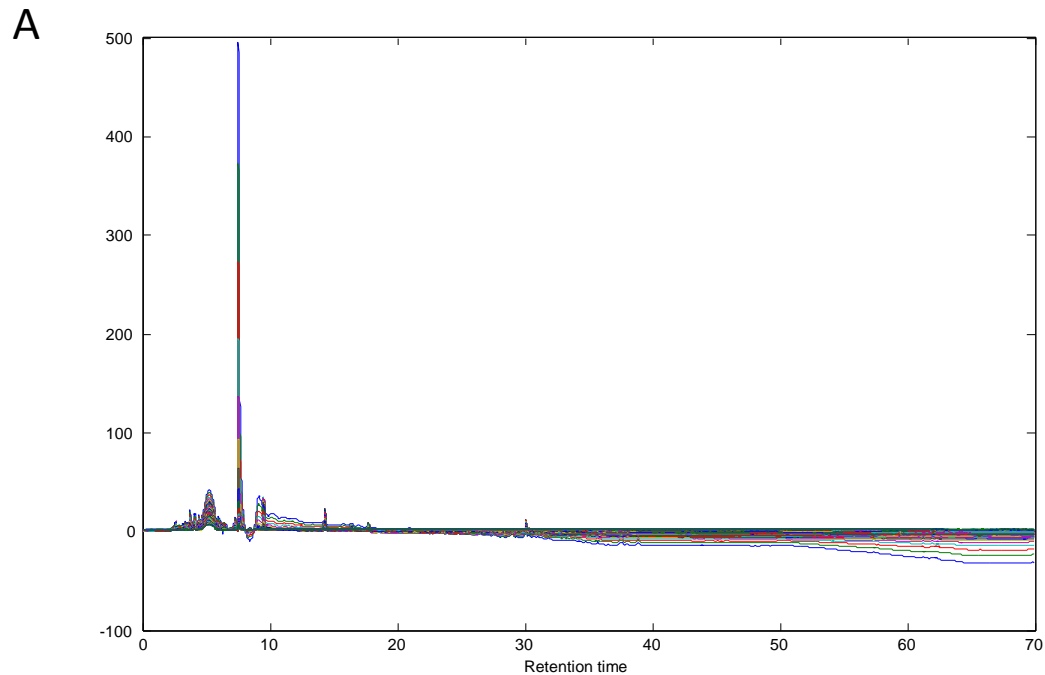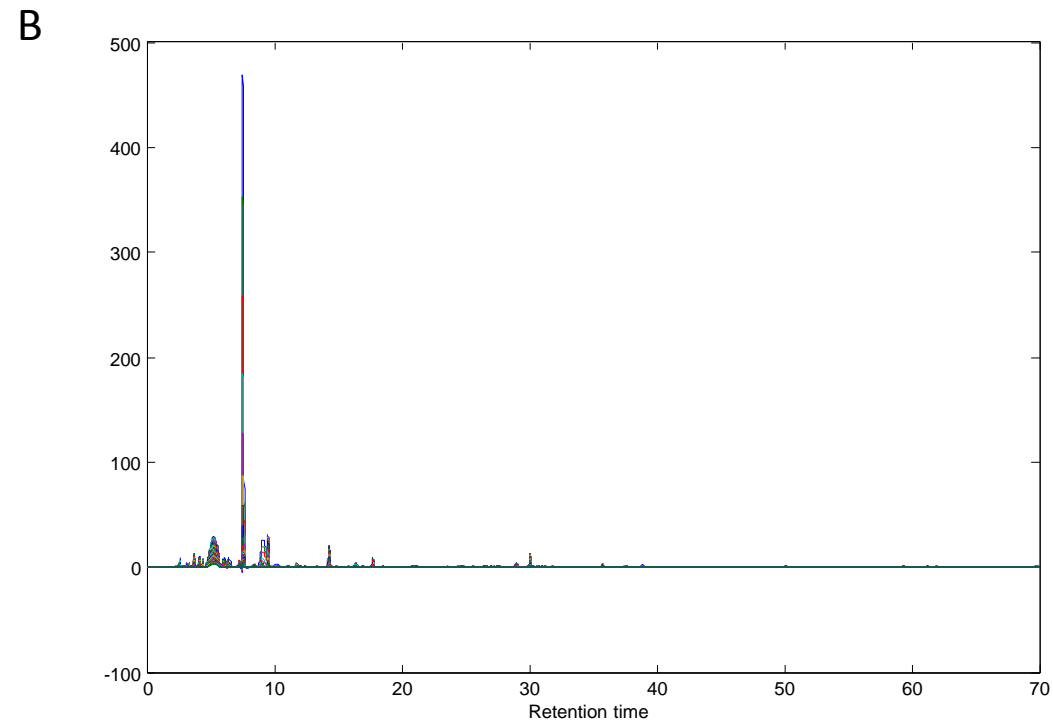

**Supplementary Figure 2:** The HPLC chromatograms of RA-A (A) before and (B) after data pre-processing were illustrated for the importance of applying the data pre-processing such as background correction and peaks alignment.

a.

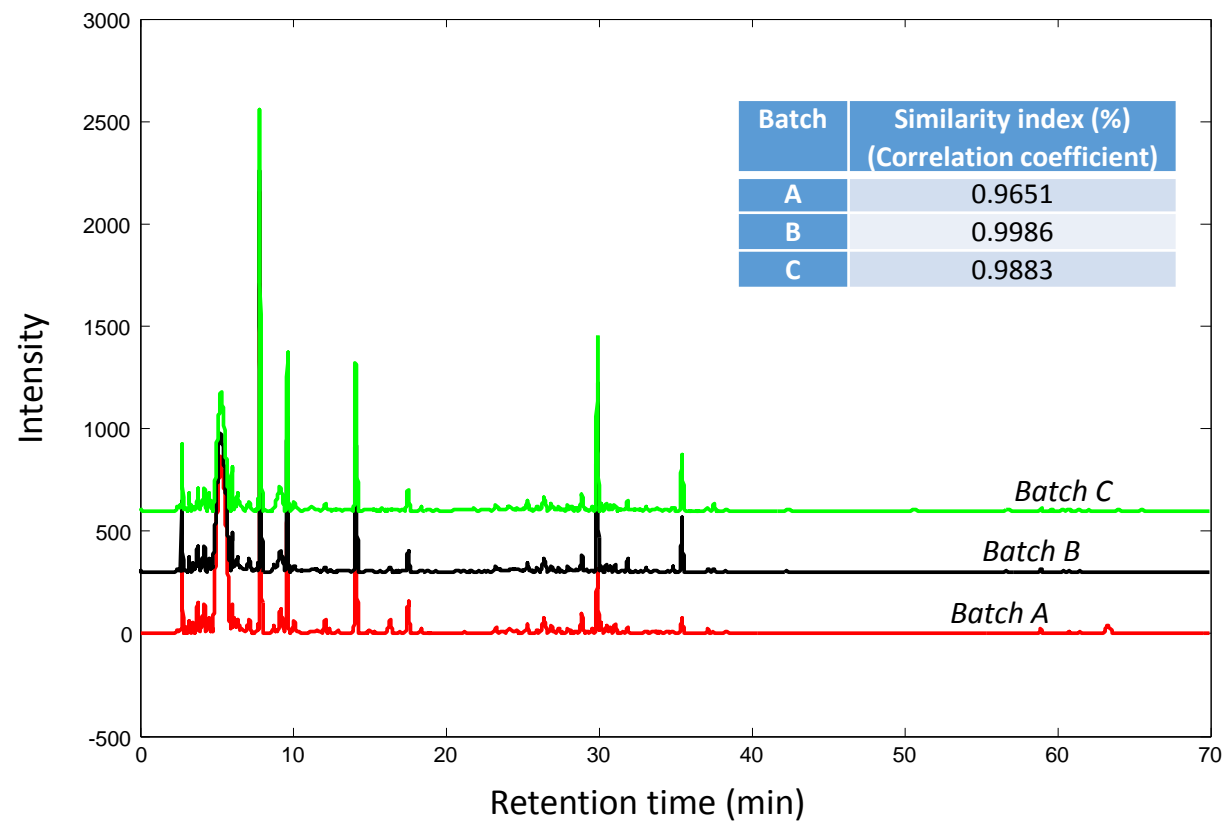

b.

The Similarity Index value of each extracts

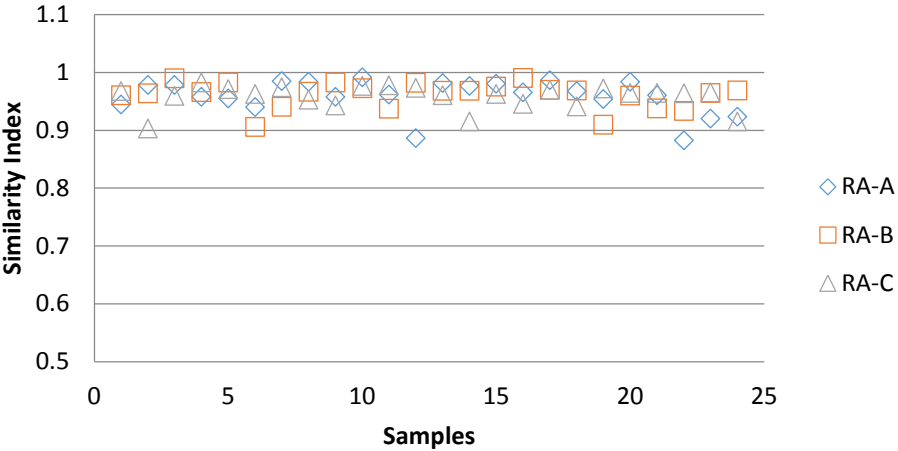

**Supplementary Figure 3:** (a) HPLC-DAD mean chromatogram (common pattern) of 72 extracts which from three batches (Red: RA-A; Black: RA-B; Green: RA-C). The table in the right top corner showed the value of the similarity indices of the three median chromatographic modes of the extracts from A, B and C with respect to their median; (b) The distribution, the mean and standard derivation of the similarity indices of each extract from three batches.

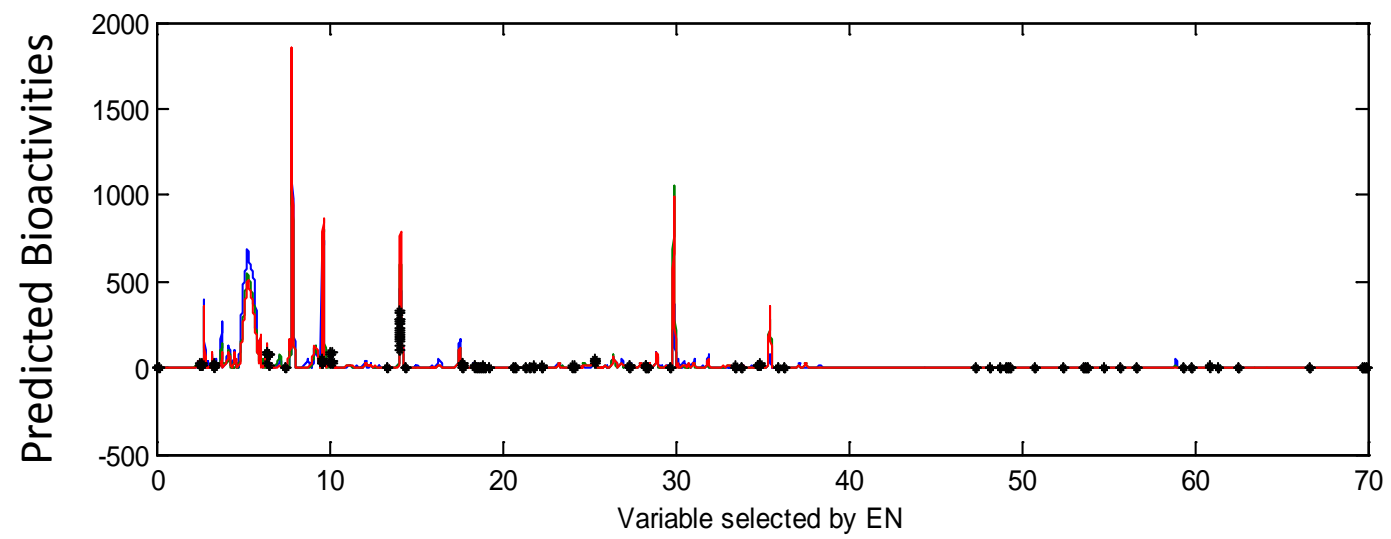

**Supplementary Figure 4:** The variables selected by Elastic Net (EN) PLS (lower) algorithm for models building in QPAR studies of Radix Astragali (RA).

**Supplementary Table 1:** A table of the result from uniform design by varying the two extraction factors (reflux time and solvent volume) for the preparation of 24 RA extracts from each batch.

| Extract | Level       |                        |
|---------|-------------|------------------------|
|         | Reflux Time | Volume of solvent used |
| 1       | 2 (2 hr)    | 4 (250 ml)             |
| 2       | 4 (4 hr)    | 2 (150 ml)             |
| 3       | 2 (2 hr)    | 4 (250 ml)             |
| 4       | 4 (4 hr)    | 3 (200 ml)             |
| 5       | 3 (3 hr)    | 1 (100 ml)             |
| 6       | 1 (1 hr)    | 2 (150 ml)             |
| 7       | 2 (2 hr)    | 3 (200 ml)             |
| 8       | 2 (2 hr)    | 1 (100 ml)             |
| 9       | 1 (1 hr)    | 4 (250 ml)             |
| 10      | 3 (3 hr)    | 1 (100 ml)             |
| 11      | 3 (3 hr)    | 2 (150 ml)             |
| 12      | 2 (2 hr)    | 2 (150 ml)             |
| 13      | 4 (4 hr)    | 3 (200 ml)             |
| 14      | 4 (4 hr)    | 1 (100 ml)             |
| 15      | 3 (3 hr)    | 4 (250 ml)             |
| 16      | 3 (3 hr)    | 3 (200 ml)             |
| 17      | 1 (1 hr)    | 2 (150 ml)             |
| 18      | 4 (4 hr)    | 4 (250 ml)             |
| 19      | 1 (1 hr)    | 3 (200 ml)             |
| 20      | 1 (1 hr)    | 1 (100 ml)             |
| 21      | 0 (0 hr)    | 4 (250 ml)             |
| 22      | 0 (0 hr)    | 1 (100 ml)             |
| 23      | 0 (0 hr)    | 3 (200 ml)             |
| 24      | 0 (0 hr)    | 2 (150 ml)             |

Uniform design based on  $CD_2$  Discrepancy:  $U_n(q^s)$ ;

n = number of runs, s = number of factors, q = number of levels

**Supplementary Table 2:** Similarity indices (SI) correlation coefficient (mean  $\pm$  SD) of each extract from the three batches with respect to their batch means chemical fingerprints.

| <b>SI</b>  | <b>Batch A</b> | <b>Batch B</b> | <b>Batch C</b> |
|------------|----------------|----------------|----------------|
| <b>Avg</b> | 0.9583         | 0.9610         | 0.9576         |
| <b>SD</b>  | 0.0297         | 0.0226         | 0.0210         |

**Supplementary Table 3:** The t-test and ANOVA results of the difference of the immunomodulatory effect among Batch A, B and C on THP-1 cells.

| CD80           |         |         |         |
|----------------|---------|---------|---------|
|                | Batch A | Batch B | Batch C |
| Mean           | 106.23  | 95.83   | 122.75  |
| S <sup>2</sup> | 115.47  | 116.17  | 160.37  |
| t-test         |         |         |         |
| Group          | A and B | A and C | B and C |
| t              | 3.28    | -4.77   | -7.77   |
| p value        | 0.002   | 1.9e-5  | 0.000   |
